# Supplementary material for: Multi-Color Single Particle Tracking with Quantum Dots
Source: PLoS One. 2012 Nov 14;7(11):e48521. doi: 10.1371/journal.pone.0048521 (PMC3498293; doi:10.1371/journal.pone.0048521)
Supplement: Table S6 — Summary of MC-SPT results for four color tracking of biotin-cap-DPPE labeled with each type of sAv-QD. (DOC) [file pone.0048521.s018.doc]

**Supporting Information Table S6.**

|  | Mean  s.t.d.  QDs per image frame | n  (Trajectories > 20 steps) | Mean  s.e.m. Trajectory Length (steps) | Mean  s.e.m.  <D5> (m2/s) |
| --- | --- | --- | --- | --- |
| sAv-QD565 | 423 | 289 | 83  6 | 0.0470.002 |
| sAv-QD605 | 212 | 142 | 12116 | 0.0520.003 |
| sAv-QD655 | 282 | 162 | 16120 | 0.0390.002 |
| sAv-QD705 | 212 | 131 | 6511 | 0.0490.003 |
